# Supplementary material for: DNA-mediated biomineralization of calcium-deficient hydroxyapatite for bone tissue engineering
Source: Royal Society of Chemistry journal article supplement (doi:10.1039/c9nj04921e), 2020-01-01
Supplement: c9nj04921e1.pdf [file c9nj04921e1.pdf]

Electronic Supplementary Material (ESI) for New Journal of Chemistry

Supporting information

## **DNA-mediated biomineralization of calcium-deficient hydroxyapatite for bone-tissue engineering**

*Xinsheng Yu,<sup>a</sup> Lianzhe Hu,<sup>b</sup> Guixia Wang,<sup>c</sup> Ting Huang,<sup>a</sup> Weili Wei,<sup>\*a</sup> Min Wang<sup>\*a</sup> and Zhining Xia<sup>a</sup>*

<sup>a</sup> School of Pharmaceutical Sciences, Chongqing University, Chongqing, 401331, China.

<sup>b</sup> Chongqing Key Laboratory of Green Synthesis and Applications, College of Chemistry, Chongqing Normal University, Chongqing, 401331, China.

<sup>c</sup> College of Chemistry and Chemical Engineering, and Henan Key Laboratory of Function-Oriented Porous Materials, Luoyang Normal University, Luoyang 471934, China.

Email: [wlwei@cqu.edu.cn](mailto:wlwei@cqu.edu.cn); [wang\\_min@cqu.edu.cn](mailto:wang_min@cqu.edu.cn).

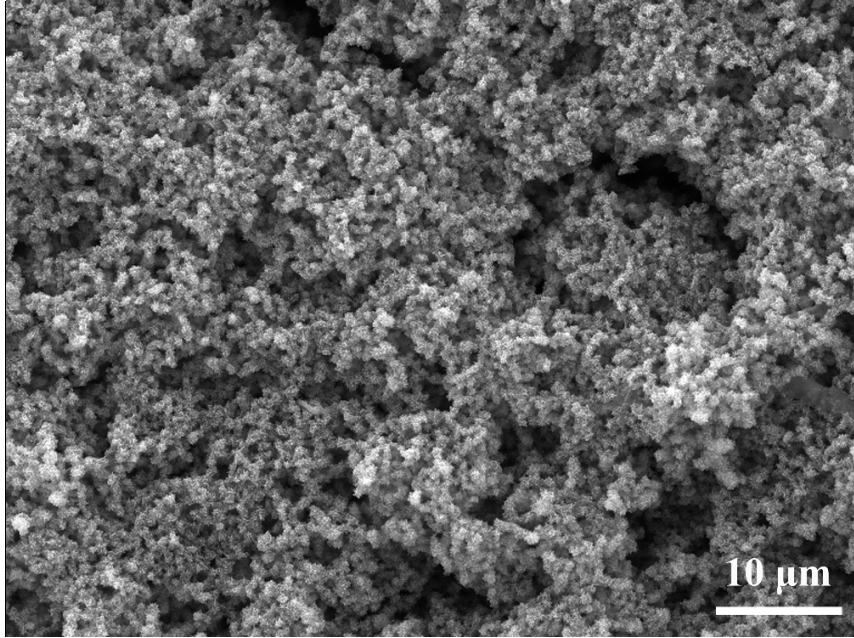

**Fig. S1** SEM image of the DNA@CdHAp composite prepared in the presence of 0.88  $\mu\text{M}$  DNA.

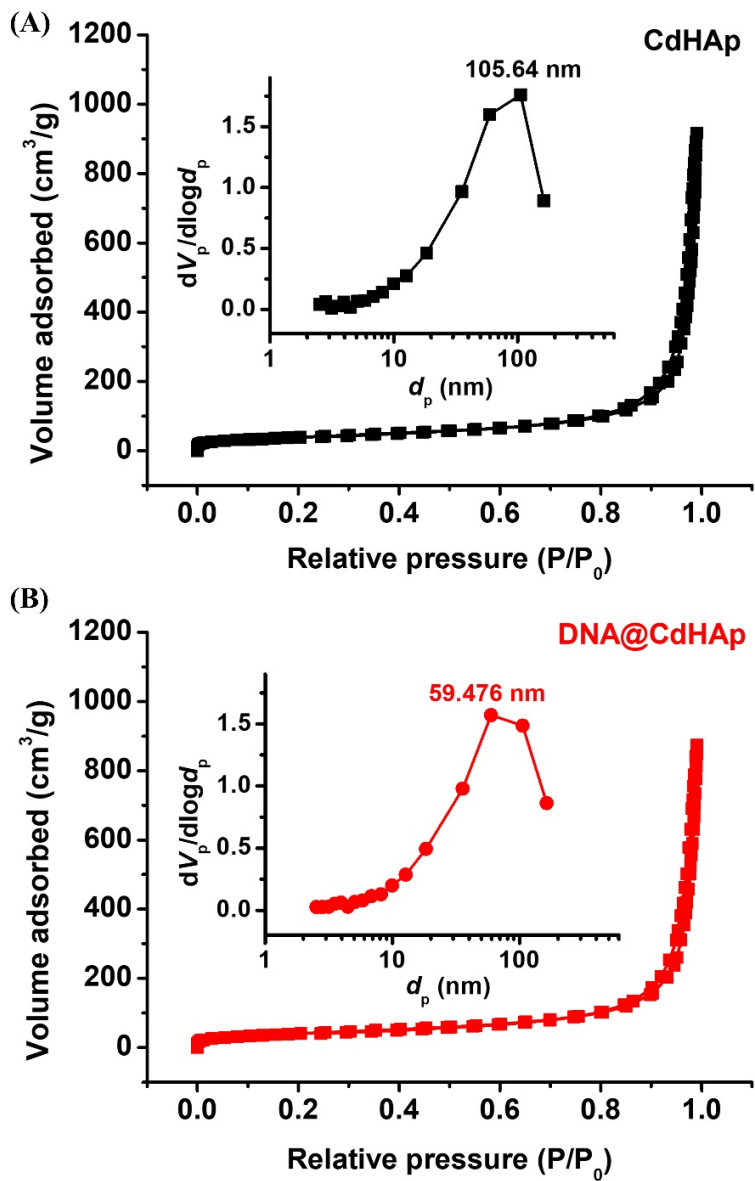

**Fig. S2** N<sub>2</sub> adsorption-desorption isotherms of pure CdHAp (A) and DNA@CdHAp composite (DNA concentration: 0.88 μM) (B). Inset: the corresponding pore size distribution based on the Bopp-Jancsó-Heinzinger (BJH) model.
